# Supplementary material for: Single-cell, locus-specific bisulfite sequencing (SLBS) for direct detection of epimutations in DNA methylation patterns
Source: PubMed Central journal article supplement (PMC4538804; doi:10.1093/nar/gkv366), 2015-04-19
Supplement: supp_gkv366_nar-03614-met-g-2014-File007.pdf [file supp_gkv366_nar-03614-met-g-2014-File007.pdf]

# Supplementary Material

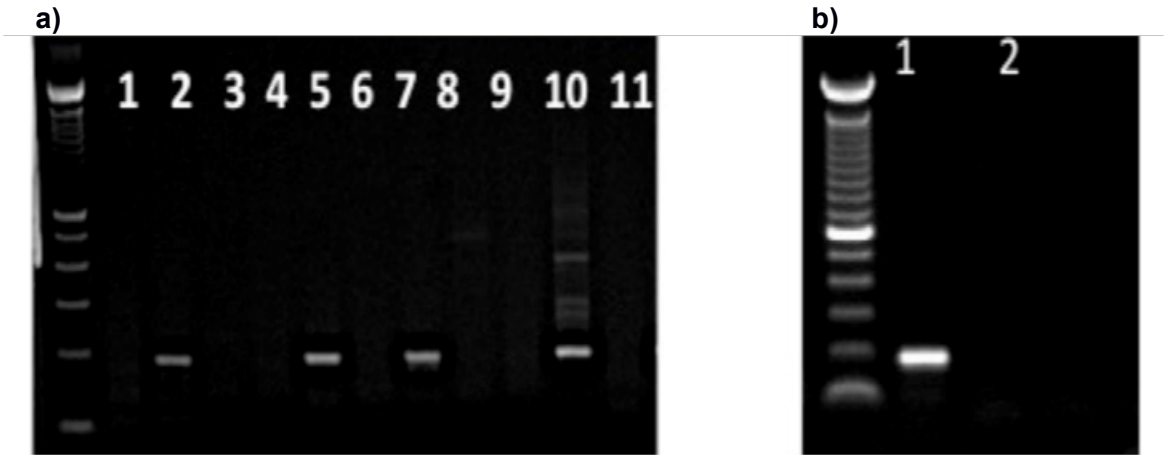

**Supplementary Figure 1.** Representative examples of conversion-specific, nested PCR of the *Nfe212* promoter from bisulfite converted single MEFs (Supplementary Fig.1a-1-9), from a pool of 100 cells (Supplementary Fig.1a-10) and from a negative control, i.e., water. To verify the specificity of the PCR for amplifying only converted DNA, 800 ng of unamplified, bisulfite-treated (Supplementary Fig.1b-1) and untreated (Supplementary Fig.1b-2), genomic DNA were subjected to the same nested PCR.

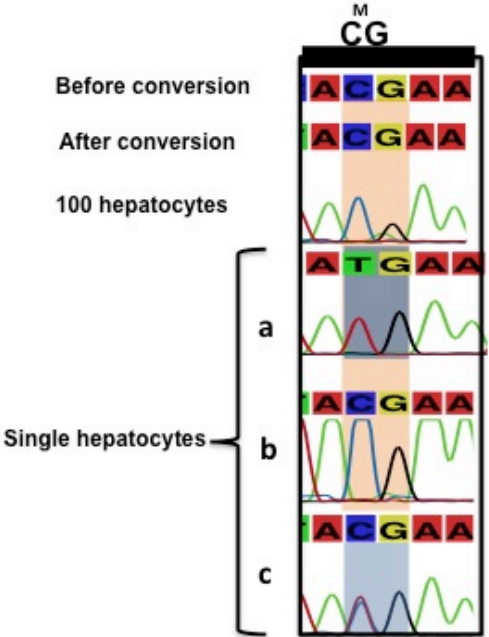

**Supplementary Figure 2.** Representative examples of a homozygously demethylating event (a), with only the thymine peak present in the Sanger sequence and a hemi-demethylating event (c) with both alleles (C/T) being represented. In (b) both alleles remain methylated. Of note, for homozygous demethylation we can never tell if this is not due to allele-specific amplification (see main text).

**Supplementary Table 1. Primer sequences used for locus specific assays**

| Gene name                      | Primer sequence                                                    |
|--------------------------------|--------------------------------------------------------------------|
| Nfe212-FW External             | 5'-AGTGGTATAGTTTTAGTTTGTGGAGAGT -3'                                |
| Nfe212-RW External             | 5'-CCACCCAAAACCCAACAAAC-3'                                         |
| Nfe212-FW Internal             | 5'-AGGAAGAGAGAGTTATGAAGTAGTAGTAAAAA-3'                             |
| Nfe212-RW Internal             | 5'-CAGTAATACGACTCACTATAGGGAGAAGGCTAATAATCTCATAAAAACCCAC-3'         |
| Cyp71a-FW External             | 5'-GAGTGAATTTTTAAGTTATGGTTGTTT-3'                                  |
| Cyp71a-RW External             | 5'-AACAAACAAAAACTTTCCATCCTAA-3'                                    |
| Cyp71a-FW Internal             | 5'-AGGAAGAGAGTTGTTTAGAAGATGAGTGTGGGAG-3'                           |
| Cyp71a-RW Internal             | 5'-CAGTAATACGACTCACTATAGGGAGAAGGCTCAAACAAAAACTTTCCATCCTAA CTT-3'   |
| Rab-FW External                | 5'-AGTGATTGGGAGTTTTGTAGTTTTGTA-3'                                  |
| Rab-RW External                | 5'-CAGTAATACGACTCACTATAGGGAGAAGGCTAAAAAAAACAATTACTCTAACTTTCA CA-3' |
| Rab-FW Internal                | 5'-AGGAAGAGAGGTGGTAAAGTGTGTTTATAGAAGGG-3'                          |
| Rab-RW Internal                | 5'-CAGTAATACGACTCACTATAGGGAGAAGGCTAAATAAACCTCCAAATCTACTACCC-3'     |
| OCT4-reg2-FW External          | 5'-GTTTTGGATATGGGTTGAAATATTG-3'                                    |
| OCT4-reg2-RW External          | 5'-CCACCCTAACCTTAACCTCTAAC-3'                                      |
| OCT4-reg2-FW Internal          | 5'-AGGAAGAGAGGATATGGGTTGAAATATTGGGTTTAT-3'                         |
| OCT4-reg2-RW Internal          | 5'-CAGTAATACGACTCACTATAGGGAGAAGGCTAATCCTCTACCCCTACCTTAAAT-3'       |
| OCT4-reg1- FW External         | 5'-AGGAAGGTTGAAAATGAAGTTTTTTT-3'                                   |
| OCT4-reg1-RW External/Internal | 5'-CAGTAATACGACTCACTATAGGGAGAAGGCTCCACCCTAACCTTAACCTCTAAC-3'       |
| OCT4-reg1-FW Internal          | 5'-AGGAAGAGAGAAGGTTGAAAATGAAGTTTTTT G-3'                           |
| L1chr18-FW External            | 5'-TATAGGGGAATGTTAGGGTTAAGAAG-3'                                   |
| L1chr18-RW External            | 5'-CAAAACAATACCACCTCAAACTA CT-3'                                   |
| L1chr18-FW Internal            | 5'-AGGAAGAGAGATAGGGGAATGTTAGGGTTAAGAAG-3'                          |
| L1chr18-RW Internal            | 5'-CAGTAATACGACTCACTATAGGGAGAAGGCTCCTAAAACCTAAAATTACAAAC ATAATT-3' |
| Dpf1-FW External               | 5'- TTTTGGGATTTAGTTTTTTGTTTTA -3'                                  |
| Dpf1-RW External/Internal      | 5'-CAGTAATACGACTCACTATAGGGAGAAGGCTACAAAACCTTTTCCTTCAAATA CC-3'     |
| Dpf1-FW Internal               | 5'-AGGAAGAGAGAGGATTAGTTGTTGTTTTGTGATGA-3'                          |
| Gabra1-FW External             | 5'-TTTTTAGGGAAGGTAAGAAAAGAGGAT-3'                                  |
| Gabra1-RW External/Internal    | 5'- CAGTAATACGACTCACTATAGGGAGAAGGCTCCTGAAAAGCACAGAGACTCC -3'       |
| Gabra1-FW Internal             | 5'-AGGAAGAGAGTGGAGTTAAGGTAAGGTATGTTTT-3'                           |

**Supplementary Table 2. Genomic coordinates of targeted regions**

| Gene name                 | Chr, accession number, sequence coordinates |
|---------------------------|---------------------------------------------|
| Nfe212 External PCR       | CHR2, NC_000068.7, (75705726; 75705387)     |
| Nfe212 Internal PCR       | CHR2, NC_000068.7, (75705634; 75705496)     |
| Cyp71a External PCR       | CHR4, AC_000026.1, (6195665; 6195374)       |
| Cyp71a Internal PCR       | CHR4, AC_000026.1, (6195645; 6195380)       |
| Rab External PCR          | CHR1, NC_000067.6, (160308632; 160309119)   |
| Rab Internal PCR          | CHR1, NC_000067.6, (160308665; 160309072)   |
| Oct4/region1 External PCR | CHR 17, AC_000039.1 (39020533; 39020963)    |
| Oct4/region1 Internal PCR | CHR 17, AC_000039.1 (39020765; 39020963)    |
| Oct4/region2 External PCR | CHR 17, AC_000039.1 (39020524; 39020963)    |
| Oct4/region2 Internal PCR | CHR 17, AC_000039.1 (39020537; 39020783)    |
| L1chr18 External PCR      | CHR18, NC_000084, (35090757; 35091027)      |
| L1chr18 Internal PCR      | CHR18, NC_000084, (35090922; 35091027)      |
| Dpf1 External PCR         | CHR7, AC_000029, (23886514; 23886893)       |
| Dpf1 Internal PCR         | CHR7, AC_000029, (23886603; 23886893)       |
| Gabra External PCR        | CHR11, NC_000077, (42183377; 42183131)      |
| Gabra Internal PCR        | CHR11, NC_000077, (42183267; 42183131)      |
